# Supplementary material
Source: PubMed Central journal article supplement (PMC7655390)
Supplement: 17-00788.pdf [file 17-00788.pdf]

On-line Table: Patients with mTBI—clinical data

| Case No. | Age (yr)/ Sex | Headache | Dizziness | Sleep                            | Emotional Lability        | Cognition                                              | Prior H/O Concussion            | Medication                                                   | Epilepsy                   |
|----------|---------------|----------|-----------|----------------------------------|---------------------------|--------------------------------------------------------|---------------------------------|--------------------------------------------------------------|----------------------------|
| 1        | 28/F          | Yes      | Yes       | Disturbed                        | No                        | Decreased concentration                                | 1 Previous episode              | Ibuprofen                                                    | No                         |
| 2        | 37/M          | Yes      | No        | Normal                           | No                        | Normal                                                 | No                              | Ibuprofen                                                    | No                         |
| 3        | 21/F          | Yes      | Yes       | Insomnia                         | Blunting of affect        | Concentration difficulty                               | 7 Previous episodes             | Lamotrigine                                                  | Dystonia/movement disorder |
| 4        | 49/F          | Yes      | No        | Hypersomnia, behavioral disorder | No                        | Normal                                                 | Multiple previous episodes      | Lisinopril                                                   | Temporal/lobe seizures     |
| 5        | 28/M          | Yes      | No        | Normal                           | Dysphoria, anxiety        | Decreased concentration                                | Multiple subconcussive episodes | Escitalopram                                                 | No                         |
| 6        | 20/F          | No       | No        | Difficulty falling asleep        | No                        | Normal                                                 | 1 Previous concussion           | None                                                         | No                         |
| 7        | 22/M          | No       | No        | Hypersomnia                      | Irritability              | Decreased concentration, attention deficit             | 1 Previous concussion           | Ondansetron                                                  | No                         |
| 8        | 19/M          | Yes      | Yes       | Normal                           | Depression, panic attacks | Memory deficits, poor attention and concentration span | 1 Previous concussion           | Alprazolam, Duloxetine, Atomoxetine, Memantine, Zolmitriptan | Nonepileptic seizures      |
| 9        | 36/F          | Yes      | Yes       | Hypersomnia                      | No                        | None                                                   | 1 Previous concussion           | Sumatriptan, Naproxen                                        | None                       |
| 10       | 70/M          | No       | Yes       | None                             | Anxiety, sadness          | Decreased concentration                                | 2 Previous concussions          | Not listed                                                   | None                       |

**Note:**—H/O indicates history of.
